# Supplementary material for: Expression of Tumor Necrosis Factor-Alpha-Mediated Genes Predicts Recurrence-Free Survival in Lung Cancer
Source: PubMed Central journal article supplement (PMC4280165; doi:10.1371/journal.pone.0115945), 2014-12-30

HNRNPAB

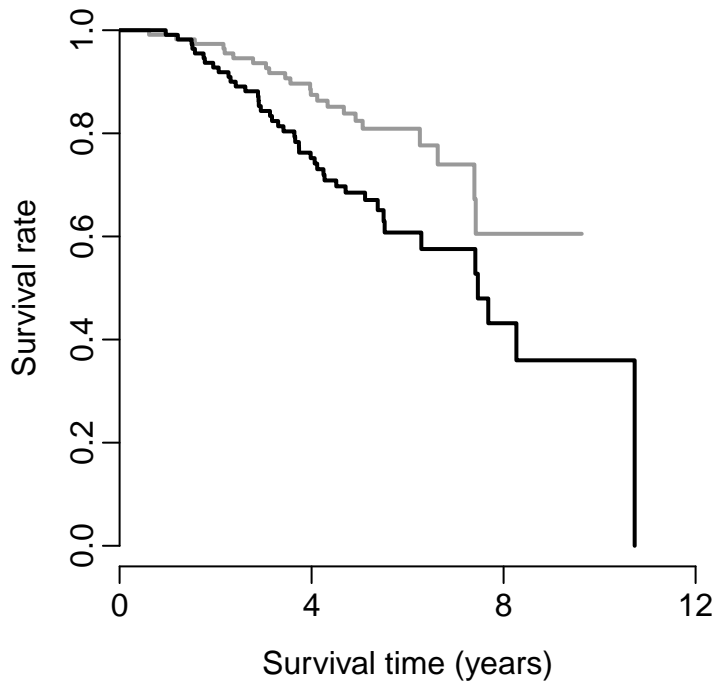

PPIL1

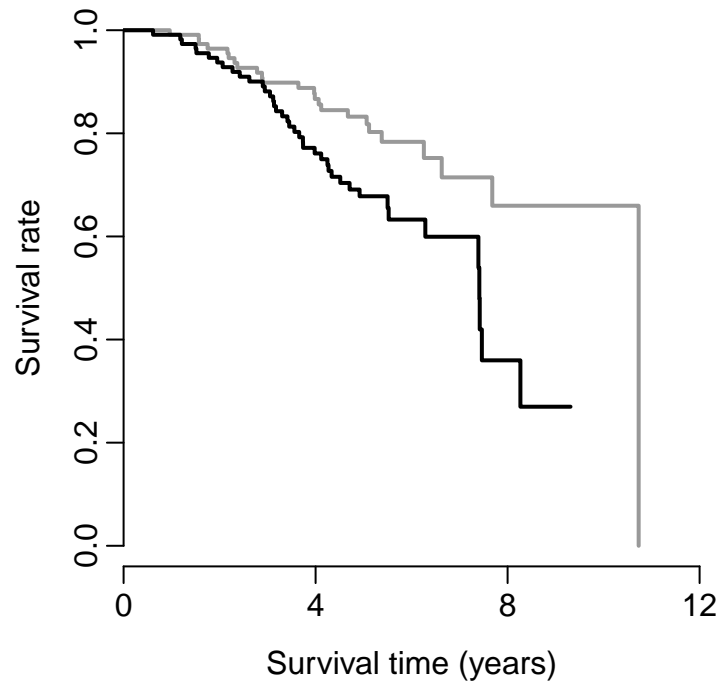

SRPK1

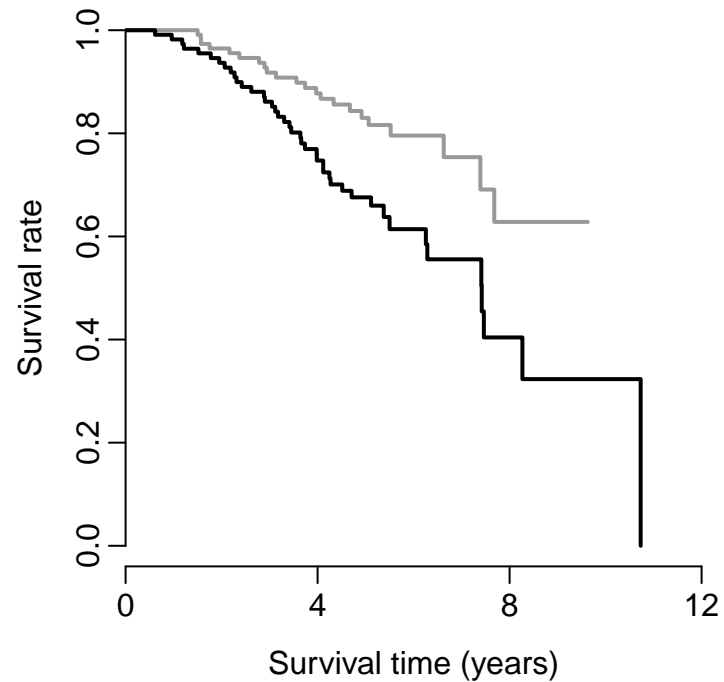

Supplement: pone.0115945.s001.pdf [file pone.0115945.s001.pdf]
