# Supplementary material for: Expression of Tumor Necrosis Factor-Alpha-Mediated Genes Predicts Recurrence-Free Survival in Lung Cancer
Source: PLoS One. 2014 Dec 30;9(12):e115945. doi: 10.1371/journal.pone.0115945 (PMC4280165; doi:10.1371/journal.pone.0115945)
Supplement: S3 Table — The TNF-α-mediated genes that are differentially expressed between the normal and tumor tissues. (XLSX) [file pone.0115945.s005.xlsx]

## Sheet: Sheet1
		ES			TW
Gene symbol	Gene description	Fold change	Adjusted P		Fold change	Adjusted P
AACS	acetoacetyl-CoA synthetase	2.46887	7.03177e-12		1.52107	2.04843e-07
ABCE1	ATP-binding cassette, sub-family E (OABP), member 1	1.9405	6.13879e-11		1.25089	0.00453649
ABHD4	abhydrolase domain containing 4	1.70146	1.36974e-06		1.55479	4.40401e-08
AGA	aspartylglucosaminidase	1.62339	0.000195713		1.66542	5.81831e-12
AKR7A2	aldo-keto reductase family 7, member A2 (aflatoxin aldehyde reductase)	1.33179	6.83688e-05		1.39704	5.6976e-05
ALDH18A1	aldehyde dehydrogenase 18 family, member A1	3.27835	7.11849e-18		2.53104	3.91003e-20
ANAPC11	anaphase promoting complex subunit 11	1.66097	2.10451e-11		1.49996	1.33785e-12
ANGEL2	angel homolog 2 (Drosophila)	1.60992	4.38772e-07		1.57737	8.07494e-06
ATF5	activating transcription factor 5	1.97624	1.93046e-07		1.27528	0.000823815
ATL3	atlastin GTPase 3	2.81939	6.09911e-11		2.17045	1.52327e-08
ATM	ataxia telangiectasia mutated	1.74565	0.00238556		1.51598	0.00923306
C12orf45	chromosome 12 open reading frame 45	1.56988	1.14764e-09		1.58852	6.06475e-12
C16orf87	chromosome 16 open reading frame 87	2.19989	1.2354e-12		1.64947	1.83014e-08
C1orf86	chromosome 1 open reading frame 86	1.38448	0.000890766		1.54808	7.60988e-07
C6orf136	chromosome 6 open reading frame 136	2.0211	2.04786e-07		1.57057	5.45913e-08
C9orf40	chromosome 9 open reading frame 40	2.2501	1.42666e-09		1.55948	0.000268597
CAD	carbamoyl-phosphate synthetase 2, aspartate transcarbamylase, and dihydroorotase	3.46161	5.27332e-16		1.66228	2.11574e-08
CAND1	cullin-associated and neddylation-dissociated 1	2.04067	7.03177e-12		1.25027	0.00228921
CBR4	carbonyl reductase 4	1.58804	2.28881e-07		1.6944	1.28842e-10
CBX5	chromobox homolog 5	1.52994	0.00178819		1.34641	1.94915e-05
CC2D1A	coiled-coil and C2 domain containing 1A	1.25497	0.0020463		1.39064	3.90203e-06
CCDC34	coiled-coil domain containing 34	7.89842	6.61074e-20		2.89451	1.32786e-12
CCDC58	coiled-coil domain containing 58	2.25269	1.21529e-08		1.29941	0.00758229
CCM2	cerebral cavernous malformation 2	1.31937	0.000127035		1.38865	5.66496e-07
CDK4	cyclin-dependent kinase 4	2.43206	4.85304e-16		1.44433	1.53366e-08
CENPN	centromere protein N	9.8588	4.67091e-19		1.89515	4.41566e-08
CENPW	centromere protein W	6.59799	7.00423e-15		2.18822	2.14258e-06
CKAP4	cytoskeleton-associated protein 4	3.3015	1.76288e-19		1.76289	1.21021e-12
CKS1B	CDC28 protein kinase regulatory subunit 1B	4.24181	1.7278e-18		2.04546	1.80785e-09
CLTC	clathrin, heavy chain (Hc)	1.55288	1.54834e-12		1.39428	6.99739e-10
COL16A1	collagen, type XVI, alpha 1	1.70906	0.00017292		1.32276	0.00461422
CPSF6	cleavage and polyadenylation specific factor 6, 68kDa	2.32586	1.25306e-18		1.45792	5.59249e-12
DCBLD1	discoidin, CUB and LCCL domain containing 1	1.83597	6.69564e-07		1.68076	4.48154e-07
DEPDC7	DEP domain containing 7	4.5545	2.77841e-12		3.36979	3.99753e-09
DERL1	derlin 1	1.80933	1.20041e-10		1.40032	1.97488e-08
E2F6	E2F transcription factor 6	1.70378	5.55756e-09		1.30058	0.000968642
EPRS	glutamyl-prolyl-tRNA synthetase	2.25161	1.3617e-15		1.60016	7.39031e-13
ERGIC3	ERGIC and golgi 3	1.54176	1.81492e-07		1.52906	4.80555e-09
ETNK1	ethanolamine kinase 1	3.25266	3.03286e-11		1.76643	2.17019e-07
FAHD1	fumarylacetoacetate hydrolase domain containing 1	1.80788	1.05616e-09		1.65917	1.01789e-12
FKBP11	FK506 binding protein 11, 19 kDa	2.41883	3.42524e-07		2.59438	1.25088e-14
FOXK2	forkhead box K2	1.92353	3.4907e-11		1.39805	1.42206e-05
FUBP1	far upstream element (FUSE) binding protein 1	1.43261	2.32207e-06		1.34082	7.23436e-05
FUT8	fucosyltransferase 8 (alpha (1,6) fucosyltransferase)	1.98508	9.36198e-10		2.84453	4.5466e-16
G2E3	G2/M-phase specific E3 ubiquitin protein ligase	2.96262	1.50614e-15		1.3173	0.00065744
GCAT	glycine C-acetyltransferase	2.4622	1.13283e-08		1.50504	7.94515e-06
GCDH	glutaryl-CoA dehydrogenase	1.59025	1.45255e-07		1.38892	3.99753e-09
GLG1	golgi glycoprotein 1	2.12634	1.63448e-12		1.4059	9.35522e-07
GORASP2	golgi reassembly stacking protein 2, 55kDa	1.7142	3.67347e-13		1.75419	1.38954e-14
GTF2H4	general transcription factor IIH, polypeptide 4, 52kDa	1.70085	4.16058e-06		1.50901	2.34347e-09
HNRNPAB	heterogeneous nuclear ribonucleoprotein A/B	1.45534	1.26386e-07		1.35583	3.60512e-06
IARS	isoleucyl-tRNA synthetase	2.10344	1.23336e-15		1.39834	2.23455e-07
IDH1	isocitrate dehydrogenase 1 (NADP+), soluble	1.64698	6.89999e-05		1.93142	6.78757e-09
IDH2	isocitrate dehydrogenase 2 (NADP+), mitochondrial	2.91217	5.40144e-14		2.21184	3.21139e-14
IGFBP3	insulin-like growth factor binding protein 3	8.85535	1.15994e-12		2.75045	1.00889e-08
IKZF2	IKAROS family zinc finger 2 (Helios)	1.43427	0.0237025		1.7683	8.65548e-08
KCTD5	potassium channel tetramerisation domain containing 5	2.06166	1.23863e-09		1.4222	6.86738e-05
LARP1	La ribonucleoprotein domain family, member 1	1.78196	2.22064e-11		1.36085	1.44226e-11
LCOR	ligand dependent nuclear receptor corepressor	1.74687	2.09413e-08		1.42618	3.21035e-07
LMBR1	limb region 1 homolog (mouse)	1.90896	1.47595e-07		1.50113	1.28154e-05
LPP	LIM domain containing preferred translocation partner in lipoma	2.63368	3.25175e-10		1.91331	3.84941e-05
LUC7L2	LUC7-like 2 (S. cerevisiae)	1.67256	2.13253e-12		1.28645	8.68752e-08
MARCKSL1	MARCKS-like 1	2.52602	2.37085e-11		2.17594	1.70046e-08
METTL15	methyltransferase like 15	1.39126	6.62582e-05		1.26668	2.14245e-05
MFSD9	major facilitator superfamily domain containing 9	2.34543	1.25587e-12		1.77191	7.32746e-07
MGA	MAX gene associated	1.46013	0.00151257		1.30095	4.04315e-05
MRPL28	mitochondrial ribosomal protein L28	1.74136	5.81683e-11		1.29663	4.54554e-05
MRPS35	mitochondrial ribosomal protein S35	1.63751	3.44154e-10		1.40742	1.28034e-05
MTFR1	mitochondrial fission regulator 1	3.62244	3.93074e-16		1.68471	1.53268e-09
MTG1	mitochondrial GTPase 1 homolog (S. cerevisiae)	1.65646	1.34577e-07		1.28521	0.000395958
MTHFD2	methylenetetrahydrofolate dehydrogenase (NADP+ dependent) 2, methenyltetrahydrofolate cyclohydrolase	3.01047	6.17043e-13		1.53465	9.27107e-05
MTMR4	myotubularin related protein 4	1.72154	1.30961e-09		1.55077	8.39575e-08
NAA15	N(alpha)-acetyltransferase 15, NatA auxiliary subunit	2.00779	1.59938e-08		1.28438	0.0167412
NAT10	N-acetyltransferase 10 (GCN5-related)	1.89457	2.37085e-11		1.46588	2.21647e-08
NCLN	nicalin	1.9044	1.21395e-10		1.2706	0.00193142
NDUFAB1	NADH dehydrogenase (ubiquinone) 1, alpha/beta subcomplex, 1, 8kDa	1.49527	2.62534e-11		1.27931	4.36872e-06
NMRAL1	NmrA-like family domain containing 1	1.49974	6.15144e-05		1.84661	1.14913e-14
NOP14	NOP14 nucleolar protein homolog (yeast)	1.38928	6.40815e-05		1.29529	2.25988e-05
NUP43	nucleoporin 43kDa	1.5166	1.19606e-08		1.55166	1.37151e-09
PCBD2	pterin-4 alpha-carbinolamine dehydratase/dimerization cofactor of hepatocyte nuclear factor 1 alpha (TCF1) 2	1.87536	6.2402e-07		2.7374	6.69595e-13
PCDH7	protocadherin 7	2.47478	5.74279e-06		1.96192	3.92151e-07
PDAP1	PDGFA associated protein 1	1.99771	3.00033e-12		1.27819	0.0164941
PGM3	phosphoglucomutase 3	2.42198	4.22999e-12		1.45023	0.000131305
PHF12	PHD finger protein 12	1.29954	0.000247204		1.56841	7.72177e-08
PLIN3	perilipin 3	1.70895	8.04324e-10		1.39125	5.8647e-07
POLG2	polymerase (DNA directed), gamma 2, accessory subunit	1.55141	9.52486e-08		1.68277	1.04621e-09
PPIL1	peptidylprolyl isomerase (cyclophilin)-like 1	2.77258	3.23767e-14		1.84396	4.11925e-10
PPP4C	protein phosphatase 4, catalytic subunit	1.77359	4.96471e-10		1.41647	3.74722e-07
PYCR1	pyrroline-5-carboxylate reductase 1	5.65085	3.04156e-18		4.25603	1.25711e-20
R3HDM1	R3H domain containing 1	2.3535	3.16641e-16		1.52498	3.30551e-08
RAI14	retinoic acid induced 14	1.40164	0.00195432		1.43274	3.12682e-05
RRN3	RRN3 RNA polymerase I transcription factor homolog (S. cerevisiae)	1.38022	1.63687e-05		1.36866	3.20694e-05
SEH1L	SEH1-like (S. cerevisiae)	2.3835	5.59375e-09		1.27927	0.0410048
SEL1L	sel-1 suppressor of lin-12-like (C. elegans)	2.15867	2.81275e-11		1.48246	0.000123842
SERBP1	SERPINE1 mRNA binding protein 1	1.75711	8.63449e-13		1.32402	2.14282e-07
SERTAD4	SERTA domain containing 4	1.8561	2.38997e-05		2.02913	7.11191e-08
SLBP	stem-loop binding protein	1.62349	7.39041e-14		1.33765	2.39894e-05
SLC38A10	solute carrier family 38, member 10	3.20816	6.58034e-14		1.4907	9.39238e-10
SMC6	structural maintenance of chromosomes 6	3.02199	1.04401e-12		1.25848	0.00520947
SND1	staphylococcal nuclease and tudor domain containing 1	1.54702	4.59811e-12		1.32106	6.50655e-10
SRPK1	SRSF protein kinase 1	2.40727	1.76775e-14		2.15549	7.20786e-16
STEAP2	STEAP family member 2, metalloreductase	1.59235	0.012286		1.52971	0.00893572
STMN1	stathmin 1	2.33886	1.37492e-08		1.638	2.17002e-06
SUPT3H	suppressor of Ty 3 homolog (S. cerevisiae)	1.94131	2.06088e-08		1.42249	1.29315e-07
SURF4	surfeit 4	2.04271	2.6802e-11		1.35849	2.04843e-07
TARS	threonyl-tRNA synthetase	2.7875	5.35557e-14		1.27836	0.000201412
TBL1XR1	transducin (beta)-like 1 X-linked receptor 1	5.59787	4.11821e-12		1.36345	0.000152932
THUMPD3	THUMP domain containing 3	1.75071	1.45217e-12		1.53224	1.89345e-11
TMCO3	transmembrane and coiled-coil domains 3	1.25971	0.0339162		1.29784	0.0288849
TMEM14A	transmembrane protein 14A	3.05087	9.90691e-12		1.55212	7.43677e-06
TMEM167A	transmembrane protein 167A	2.12479	3.03286e-11		1.79166	1.49874e-10
TMPO	thymopoietin	4.89495	5.48903e-18		1.81414	1.31616e-09
TNPO1	transportin 1	4.08187	1.71317e-17		2.78366	1.61387e-19
TRIM2	tripartite motif containing 2	2.86932	4.91219e-13		3.85723	6.7566e-16
UBE2G1	ubiquitin-conjugating enzyme E2G 1	1.8635	6.6376e-11		1.26552	0.00065744
UBE2H	ubiquitin-conjugating enzyme E2H	2.86034	4.866e-12		1.44875	1.68835e-06
UBFD1	ubiquitin family domain containing 1	3.07224	1.06325e-16		2.66094	1.54919e-12
USP32	ubiquitin specific peptidase 32	2.08414	1.49193e-13		1.26542	0.000420188
VGLL4	vestigial like 4 (Drosophila)	1.393	0.000906441		1.36483	9.00002e-06
WDR77	WD repeat domain 77	2.27754	4.57189e-10		1.51603	4.43466e-06
WHSC1	Wolf-Hirschhorn syndrome candidate 1	3.47819	2.5114e-16		1.99856	2.51687e-09
XPO5	exportin 5	2.57331	1.38435e-12		1.53609	1.8248e-08
YARS2	tyrosyl-tRNA synthetase 2, mitochondrial	1.66656	1.04359e-08		1.2731	2.49407e-06
YIPF5	Yip1 domain family, member 5	1.68934	1.71229e-07		1.52528	1.07735e-09
ZBED4	zinc finger, BED-type containing 4	2.47785	1.93693e-09		1.4112	0.00228921
ZFP64	zinc finger protein 64 homolog (mouse)	2.01307	1.75985e-12		1.55156	6.28679e-08
ZNF146	zinc finger protein 146	1.91709	4.91219e-13		1.49132	6.64411e-11
ZNF2	zinc finger protein 2	1.31037	0.0011799		1.28684	0.000106955
ZNF239	zinc finger protein 239	1.73753	0.000221088		1.51689	7.05896e-08
ABHD6	abhydrolase domain containing 6	0.365392	2.26966e-11		0.366526	2.56927e-14
ADAMTS1	ADAM metallopeptidase with thrombospondin type 1 motif, 1	0.229826	2.17736e-11		0.154395	1.16617e-12
ADCY9	adenylate cyclase 9	0.372619	2.94607e-13		0.645067	7.23436e-05
ADHFE1	alcohol dehydrogenase, iron containing, 1	0.242655	6.83804e-18		0.505594	7.4774e-08
ALDH3A2	aldehyde dehydrogenase 3 family, member A2	0.593247	0.000145321		0.775222	0.00343005
AMOTL1	angiomotin like 1	0.590503	2.67769e-06		0.300297	1.32786e-12
ANKRD13A	ankyrin repeat domain 13A	0.547993	4.57791e-10		0.796901	5.57681e-05
ANTXR2	anthrax toxin receptor 2	0.599728	0.000521036		0.749804	0.000187886
AQP1	aquaporin 1 (Colton blood group)	0.113568	5.31792e-16		0.22252	1.79973e-10
ARHGAP29	Rho GTPase activating protein 29	0.197161	4.57232e-13		0.319115	7.20786e-16
ATP8B2	ATPase, aminophospholipid transporter, class I, type 8B, member 2	0.636921	4.38502e-05		0.766073	0.0168452
ATXN2	ataxin 2	0.738627	3.1249e-06		0.770858	5.45289e-06
BCAP29	B-cell receptor-associated protein 29	0.616022	4.39977e-07		0.521316	1.09274e-09
BDP1	B double prime 1, subunit of RNA polymerase III transcription initiation factor IIIB	0.766204	0.000452724		0.773989	0.000698474
BMPR1A	bone morphogenetic protein receptor, type IA	0.793406	0.0061121		0.733375	3.12682e-05
C16orf52	chromosome 16 open reading frame 52	0.693058	4.55745e-06		0.7583	0.00013787
CCDC85B	coiled-coil domain containing 85B	0.632218	9.18566e-07		0.612196	1.54739e-10
CFLAR	CASP8 and FADD-like apoptosis regulator	0.146947	1.79483e-17		0.333164	5.20533e-12
CKB	creatine kinase, brain	0.653439	0.000809243		0.729316	0.0134754
CLN8	ceroid-lipofuscinosis, neuronal 8 (epilepsy, progressive with mental retardation)	0.627807	1.76258e-08		0.529029	1.17404e-10
CRY1	cryptochrome 1 (photolyase-like)	0.556677	9.60981e-12		0.663808	2.10659e-07
CTDSPL	CTD (carboxy-terminal domain, RNA polymerase II, polypeptide A) small phosphatase-like	0.39566	4.21678e-14		0.59867	2.69267e-08
CYLD	cylindromatosis (turban tumor syndrome)	0.432002	3.82631e-11		0.624357	1.29315e-07
DCP1A	DCP1 decapping enzyme homolog A (S. cerevisiae)	0.710533	1.90638e-05		0.714672	1.90961e-09
DOCK9	dedicator of cytokinesis 9	0.373869	6.9572e-12		0.526192	1.15314e-09
EDNRB	endothelin receptor type B	0.0841492	6.71905e-21		0.0451708	1.25711e-20
EIF1B	eukaryotic translation initiation factor 1B	0.563638	5.93544e-14		0.651593	3.5369e-10
ELF1	E74-like factor 1 (ets domain transcription factor)	0.669053	2.92586e-06		0.714152	0.00091969
ELTD1	EGF, latrophilin and seven transmembrane domain containing 1	0.307122	1.69884e-11		0.32269	4.39074e-12
EXOC6	exocyst complex component 6	0.518582	6.22845e-09		0.681523	3.30551e-08
FBXL14	F-box and leucine-rich repeat protein 14	0.700577	0.00090249		0.784635	0.000341032
GADD45B	growth arrest and DNA-damage-inducible, beta	0.121896	3.75764e-17		0.279227	1.56619e-13
GATAD2B	GATA zinc finger domain containing 2B	0.525581	2.14077e-07		0.688164	3.37113e-05
H2AFJ	H2A histone family, member J	0.593132	2.99201e-08		0.430627	1.27969e-10
HBP1	HMG-box transcription factor 1	0.746295	8.6305e-07		0.751284	6.54949e-05
HDAC4	histone deacetylase 4	0.63817	4.37704e-05		0.533768	4.04989e-11
HERC1	HECT and RLD domain containing E3 ubiquitin protein ligase family member 1	0.620153	7.54543e-11		0.720293	2.3913e-06
IL17RA	interleukin 17 receptor A	0.567662	2.97395e-07		0.58468	1.66476e-10
INPP1	inositol polyphosphate-1-phosphatase	0.483592	3.51321e-07		0.471031	1.24087e-11
INPP5A	inositol polyphosphate-5-phosphatase, 40kDa	0.502946	5.18798e-11		0.441592	1.22578e-14
ITM2B	integral membrane protein 2B	0.605063	4.92833e-11		0.757788	2.89409e-09
KIAA0368	KIAA0368	0.445625	1.49887e-12		0.462137	9.93957e-10
KIAA1033	KIAA1033	0.750213	9.53109e-06		0.789592	0.00043716
LNX2	ligand of numb-protein X 2	0.558055	1.55043e-09		0.723781	0.000950563
LPAR6	lysophosphatidic acid receptor 6	0.71145	0.00675776		0.579069	9.01233e-06
MAN2C1	mannosidase, alpha, class 2C, member 1	0.461777	3.34164e-11		0.638154	5.36138e-08
MAPK8	mitogen-activated protein kinase 8	0.616102	1.01466e-06		0.666545	9.5698e-11
MCL1	myeloid cell leukemia sequence 1 (BCL2-related)	0.484014	7.74551e-12		0.646929	2.09228e-12
MPPE1	metallophosphoesterase 1	0.642872	4.72407e-07		0.733292	2.5503e-05
MSL1	male-specific lethal 1 homolog (Drosophila)	0.709417	3.16998e-06		0.725649	1.65275e-05
MT1H	metallothionein 1H	0.279857	4.89175e-09		0.541964	4.15815e-08
MYO1B	myosin IB	0.474291	3.42368e-11		0.573911	4.35267e-07
NACC2	NACC family member 2, BEN and BTB (POZ) domain containing	0.413461	2.34402e-12		0.471474	2.64878e-14
NDST1	N-deacetylase/N-sulfotransferase (heparan glucosaminyl) 1	0.522242	3.32315e-12		0.460138	2.18772e-13
NEDD4L	neural precursor cell expressed, developmentally down-regulated 4-like, E3 ubiquitin protein ligase	0.139152	2.17518e-16		0.210764	5.98603e-13
NFAT5	nuclear factor of activated T-cells 5, tonicity-responsive	0.668672	2.5855e-07		0.713861	5.36604e-07
NFKBIZ	nuclear factor of kappa light polypeptide gene enhancer in B-cells inhibitor, zeta	0.216739	1.47883e-13		0.348057	2.13726e-10
NR3C1	nuclear receptor subfamily 3, group C, member 1 (glucocorticoid receptor)	0.522441	6.08621e-13		0.658642	2.84641e-07
PARVA	parvin, alpha	0.402281	7.03177e-12		0.499423	7.39031e-13
PDCD6IP	programmed cell death 6 interacting protein	0.417429	1.47883e-13		0.655167	1.97547e-05
PFKFB3	6-phosphofructo-2-kinase/fructose-2,6-biphosphatase 3	0.627052	0.000341408		0.523631	1.00838e-09
PGM1	phosphoglucomutase 1	0.656194	1.55594e-05		0.747476	0.000441716
PJA2	praja ring finger 2, E3 ubiquitin protein ligase	0.590139	6.51364e-10		0.762563	9.68085e-05
PKDCC	protein kinase domain containing, cytoplasmic homolog (mouse)	0.303682	4.38076e-08		0.317122	2.82972e-11
PLEKHG1	pleckstrin homology domain containing, family G (with RhoGef domain) member 1	0.719999	0.0427138		0.539938	7.71642e-05
PLK2	polo-like kinase 2	0.786094	0.0484781		0.566103	6.54142e-07
PLXND1	plexin D1	0.488872	5.59027e-08		0.729836	0.00158818
POLR1D	polymerase (RNA) I polypeptide D, 16kDa	0.76953	0.000138109		0.714253	4.48154e-07
PPAP2A	phosphatidic acid phosphatase type 2A	0.680927	0.00046103		0.703017	3.34375e-05
PPP6C	protein phosphatase 6, catalytic subunit	0.485578	2.41242e-12		0.523398	1.6886e-14
PRKAG2	protein kinase, AMP-activated, gamma 2 non-catalytic subunit	0.561728	1.42374e-08		0.710923	4.65345e-08
PRKAR2B	protein kinase, cAMP-dependent, regulatory, type II, beta	0.413633	6.26555e-08		0.41428	4.22301e-07
PRMT2	protein arginine methyltransferase 2	0.424311	1.1268e-12		0.690535	2.42546e-05
PTPN21	protein tyrosine phosphatase, non-receptor type 21	0.0905036	1.76288e-19		0.180719	4.82819e-17
RABEP1	rabaptin, RAB GTPase binding effector protein 1	0.64875	2.03159e-07		0.738345	4.04315e-05
RAF1	v-raf-1 murine leukemia viral oncogene homolog 1	0.755444	4.97904e-07		0.637813	6.12762e-07
RAPGEF1	Rap guanine nucleotide exchange factor (GEF) 1	0.566234	2.22908e-09		0.517046	8.20837e-15
RC3H1	ring finger and CCCH-type domains 1	0.656203	1.37143e-10		0.647078	4.21209e-11
RILPL2	Rab interacting lysosomal protein-like 2	0.320401	1.62857e-18		0.459992	8.20837e-15
RNF10	ring finger protein 10	0.464655	1.2614e-14		0.638541	2.58881e-07
RNF11	ring finger protein 11	0.760717	4.58881e-05		0.776208	4.85264e-05
RPS6KA2	ribosomal protein S6 kinase, 90kDa, polypeptide 2	0.198588	1.8805e-13		0.47319	1.08451e-08
RUFY3	RUN and FYVE domain containing 3	0.393822	4.55428e-14		0.665058	2.72233e-05
SCAPER	S-phase cyclin A-associated protein in the ER	0.535896	1.3484e-07		0.731674	1.94915e-05
SEPT10	septin 10	0.751827	0.00242622		0.473306	9.5698e-11
SERINC3	serine incorporator 3	0.604388	1.39353e-08		0.679084	1.86451e-12
SERTAD3	SERTA domain containing 3	0.626821	7.67446e-06		0.687407	4.49286e-07
SF1	splicing factor 1	0.292176	4.02188e-07		0.788957	3.47867e-06
SH3D19	SH3 domain containing 19	0.378719	5.45507e-16		0.453354	2.33147e-09
SKI	v-ski sarcoma viral oncogene homolog (avian)	0.573341	8.07809e-09		0.704734	1.39424e-07
SLC19A2	solute carrier family 19 (thiamine transporter), member 2	0.385083	4.28357e-10		0.509354	2.61236e-07
SLK	STE20-like kinase	0.404029	2.77841e-12		0.466978	9.48306e-15
SRSF7	serine/arginine-rich splicing factor 7	0.329266	7.74551e-12		0.689479	1.86451e-12
STXBP5	syntaxin binding protein 5 (tomosyn)	0.724153	9.94564e-07		0.783141	0.000617198
SYNE1	spectrin repeat containing, nuclear envelope 1	0.192427	1.41925e-12		0.450068	2.0197e-07
SYNM	synemin, intermediate filament protein	0.287718	1.83638e-11		0.144327	1.53918e-16
TACC1	transforming, acidic coiled-coil containing protein 1	0.335853	1.01941e-11		0.288243	7.5477e-19
TLE4	transducin-like enhancer of split 4 (E(sp1) homolog, Drosophila)	0.630195	8.39495e-05		0.545801	6.19176e-13
TMOD3	tropomodulin 3 (ubiquitous)	0.701988	1.23266e-05		0.585109	3.5369e-10
UBE2I	ubiquitin-conjugating enzyme E2I	0.372341	1.08745e-12		0.576476	1.498e-08
UTRN	utrophin	0.307181	1.36665e-16		0.488814	2.71579e-15
VPS13A	vacuolar protein sorting 13 homolog A (S. cerevisiae)	0.463452	1.09105e-13		0.669766	7.39855e-05
WDFY3	WD repeat and FYVE domain containing 3	0.595696	9.41246e-10		0.673987	6.50554e-09
